# Supplementary material
Source: PubMed Central journal article supplement (PMC6777459)
Supplement: 41431_2019_398_MOESM3_ESM.pdf [file 41431_2019_398_MOESM3_ESM.pdf]

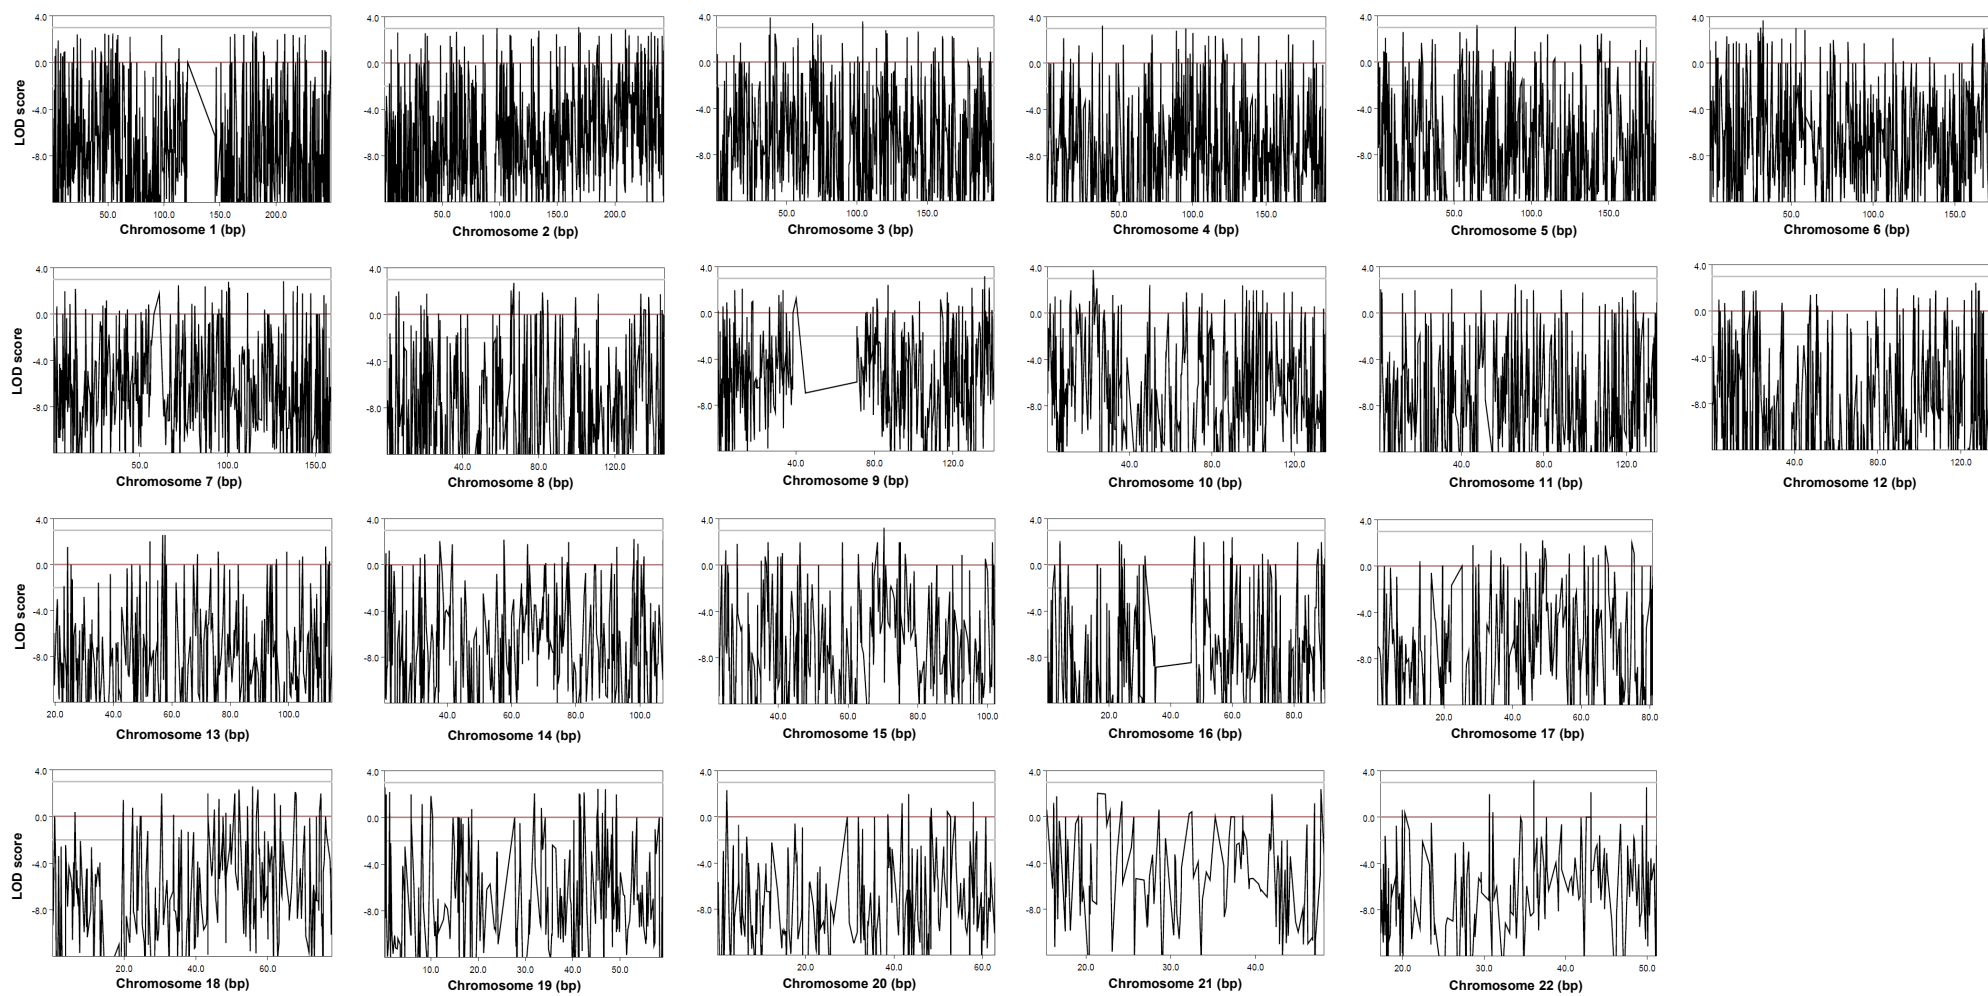

Supplementary Figure 3. Genome-wide additive linkage analysis of all PKSLI families under recessive mode inheritance with complete penetrance.
